# Supplementary material
Source: MDPI journal article supplement (https://www.mdpi.com/2072-4292/16/2/229)
Supplement: s1 [file s1]

# Monitoring suspended sediment transport in the lower Yellow River using Landsat observations

Mengwei Duan <sup>1,2,†</sup>, Zhiqiang Qiu <sup>3,†</sup>, Ruren Li <sup>1</sup>, Keyu Li <sup>3</sup>, Shujie Yu <sup>4,\*‡</sup>, Dong Liu <sup>2,‡</sup>

<sup>1</sup> School of Transportation and Geomatics Engineering, Shenyang Jianzhu University, Shenyang 110168, China

<sup>2</sup> Key Laboratory of Watershed Geographic Sciences, Nanjing Institute of Geography and Limnology, Chinese Academy of Sciences, Nanjing 210008, China

<sup>3</sup> College of Urban and Environmental Sciences, Northwest University, Xi'an 710127, China

<sup>4</sup> State Key Laboratory of Satellite Ocean Environment Dynamics, Second Institute of Oceanography, Ministry of Natural Resources, Hangzhou 310012, China

\* **Corresponding author.** yushujie@sio.org.cn

<sup>†</sup> These authors contributed equally to this work.

<sup>‡</sup> These authors also contributed equally to this work.

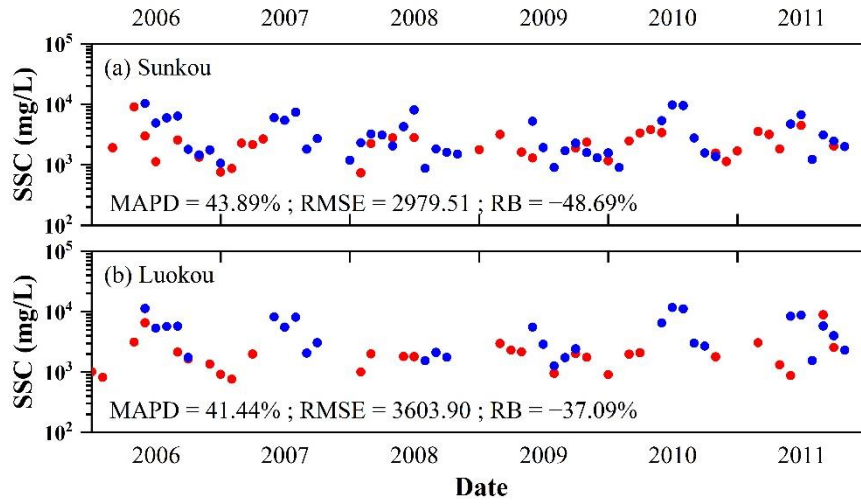

**Figure S1.** Comparison of time series data of in situ (in blue) and satellite-derived (in red) SSC at the (a) Sunkou and (b) Luokou Hydrological Stations. Please refer to Figure 1 for the geographical locations of the stations.

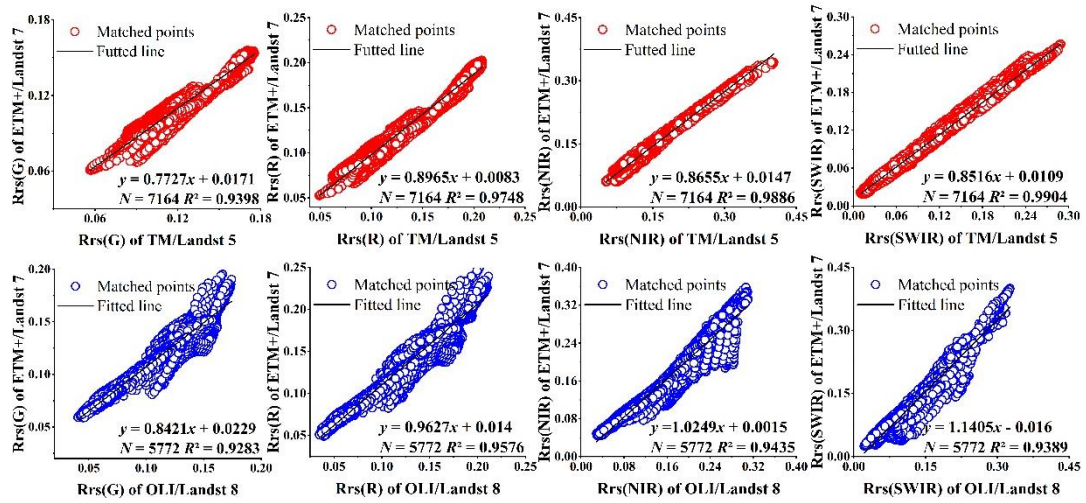

**Figure S2.** The inter-calibration of Landsat for the individual channels. Rrs(NIR), Rrs(R), Rrs(G), and Rrs(SWIR) correspond to the Rrs in the near-infrared, red, green, and short-wave infrared bands, respectively.

**Table S1.** Index table of main acronyms

| Acronyms | Full name                                |
|----------|------------------------------------------|
| SSC      | Suspended sediment concentration         |
| Rrs      | Remote sensing reflectance               |
| MODIS    | Moderate-Resolution Imaging Spectrometry |
| SeaWiFS  | Sea-Viewing Wide-Field-of-View Sensor    |
| OLCI     | Ocean and Land Color Instrument          |
| TM       | Thematic Mapper                          |
| ETM+     | Enhanced Thematic Mapper Plus            |
| OLI      | Operational Land Imager                  |
| GloFAS   | Global Flood Awareness System            |
| GEE      | Google Earth Engine                      |
| MAPD     | Mean absolute percent difference         |
| RMSE     | Root-mean-square error                   |
| RB       | Relative bias                            |

**Table S2.** The monthly in situ SSC for the four hydrological stations during two periods. The table shows the arithmetic mean values of the measured SSC (Section 2.2).

| Station    | SSC range (mg/L)       |                         | Mean $\pm$ std (mg/L)     |                           |
|------------|------------------------|-------------------------|---------------------------|---------------------------|
|            | pre-WSR<br>(1984-1989) | post-WSR<br>(2006-2012) | pre-WSR<br>(1984-1989)    | post-WSR<br>(2006-2012)   |
| Sanmenxia  | 172.86-99,793.55       | 327.67-215,813.60       | 24,719.04 $\pm$ 24,341.31 | 28,559.36 $\pm$ 50,874.09 |
| Xiaolangdi | 98.83-95,414.84        | 193.00-40,400.00        | 16,094.19 $\pm$ 22,713.97 | 13,171.10 $\pm$ 12,100.94 |
| Huayuankou | 2471.67-61,322.58      | 379.68-10,121.81        | 11,301.60 $\pm$ 12,180.83 | 1552.63 $\pm$ 1945.08     |
| Lijin      | 402.26-63,203.23       | 115.35-12,670.65        | 9583.38 $\pm$ 12,148.50   | 2737.53 $\pm$ 2989.98     |

**Table S3.** Mean Landsat-derived SSC for five stations during 1984-2022.

| Station            | SSC (mg/L)      |
|--------------------|-----------------|
|                    | Mean ± std      |
| Upstream Sanmenxia | 2998.33±1221.41 |
| Sanmenxia          | 1008.42±602.83  |
| Xiaolangdi         | 1177.89±627.95  |
| Huayuankou         | 1580.63±758.18  |
| Lijin              | 2424.38±1561.25 |

**Table S4.** Decadal mean Landsat-derived SSC at two stations on the Yellow River.

| Station            | SSC (mg/L)       |                |
|--------------------|------------------|----------------|
|                    | Mean ± std       |                |
|                    | 1980s            | 2020s          |
| Upstream Sanmenxia | 3580.53±2,051.45 | 1563.75±271.36 |
| Lijin              | 3952.90±911.03   | 1529.14±199.60 |

**Table S5.** Seasonal mean SSC in the entire downstream Yellow River

|       | SSC (mg/L)      |                    |                    |                  |
|-------|-----------------|--------------------|--------------------|------------------|
|       | Mean ± std      |                    |                    |                  |
|       | Spring          | Summer             | Autumn             | Winter           |
| 1990s | 4795.40±2282.57 | 9556.65 ± 3512.06  | 8791.17 ± 3,422.69 | 2794.15 ± 917.43 |
| 2010s | 2438.83±4212.89 | 5536.43 ± 2,188.77 | 1851.59 ± 2,495.81 | 814.11 ± 158.27  |

**Table S6.** Semiannual mean SSC retrieved from Landsat in two reservoirs.

| Reservoirs | Winter and spring | Summer and autumn |
|------------|-------------------|-------------------|
| Sanmenxia  | 1,113.94 ± 184.90 | 1579.66 ± 213.77  |
| Xiaolangdi | 919.182 ± 297.92  | 1391.83 ± 222.53  |
